# Supplementary material for: Use of Different Organic Carbon Sources in Cynara cardunculus Cells: Effects on Biomass Productivity and Secondary Metabolites
Source: MDPI journal article supplement (doi:10.3390/plants11050701), 2022-03-05
Supplement: s1 [file s1]

## Supplementary materials.

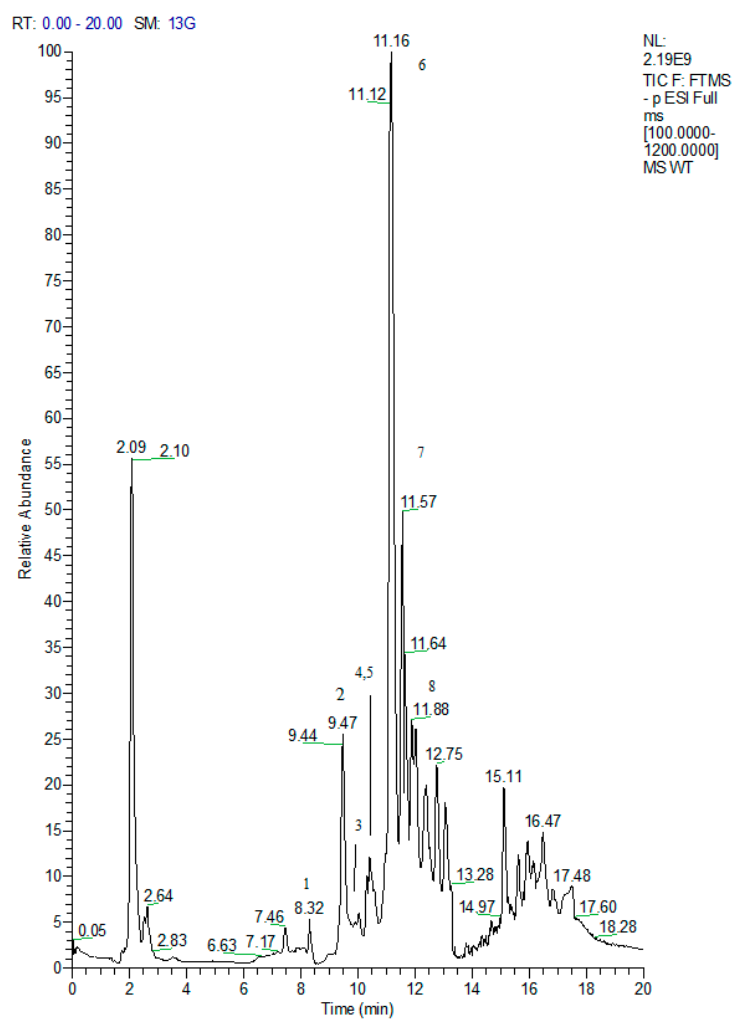

**Figures S1.** HPLC chromatogram for phenolic compounds. Peak numbers refer to phenolic compounds are reported in Table 2.
